# Supplementary material
Source: HighWire-hosted journal article supplement (http://jnm-client.smart01.highwire.org/highwire/filestream/110595/field_highwire_adjunct_files/0/265016_Supplemental_Data.pdf)
Supplement: 265016_Supplemental_Data.pdf [file 265016_Supplemental_Data.pdf]

Supplemental Table 1

|                                       | Sensitivity      | Specificity      | References                                                          |
|---------------------------------------|------------------|------------------|---------------------------------------------------------------------|
| Leuven Score<br>(cut-off 16)          | 89.6 (85.3-92.9) | 93.3 (87.6-96.9) | Moreel et al. (45)<br>vdGeest et al. (44)<br>Henckaerts et al. (43) |
| Leuven/Groningen Score<br>(cut-off 8) | 92.5 (88.0-95.8) | 93.1 (86.4-97.2) | Moreel et al. (45)<br>vdGeest et al. (44)                           |

Pooled estimates of the diagnostic parameters were determined with a univariate random effects model (DerSimonian-Laird method) and summary estimates were only shown if heterogeneity ( $I^2$ ) was < 75%. Univariate models were evaluated with MetaDiSc version 1.4
